# Supplementary material
Source: PubMed Central journal article supplement (PMC7282059)

# COVID-19 Total positive cases on April 24<sup>th</sup> 2020

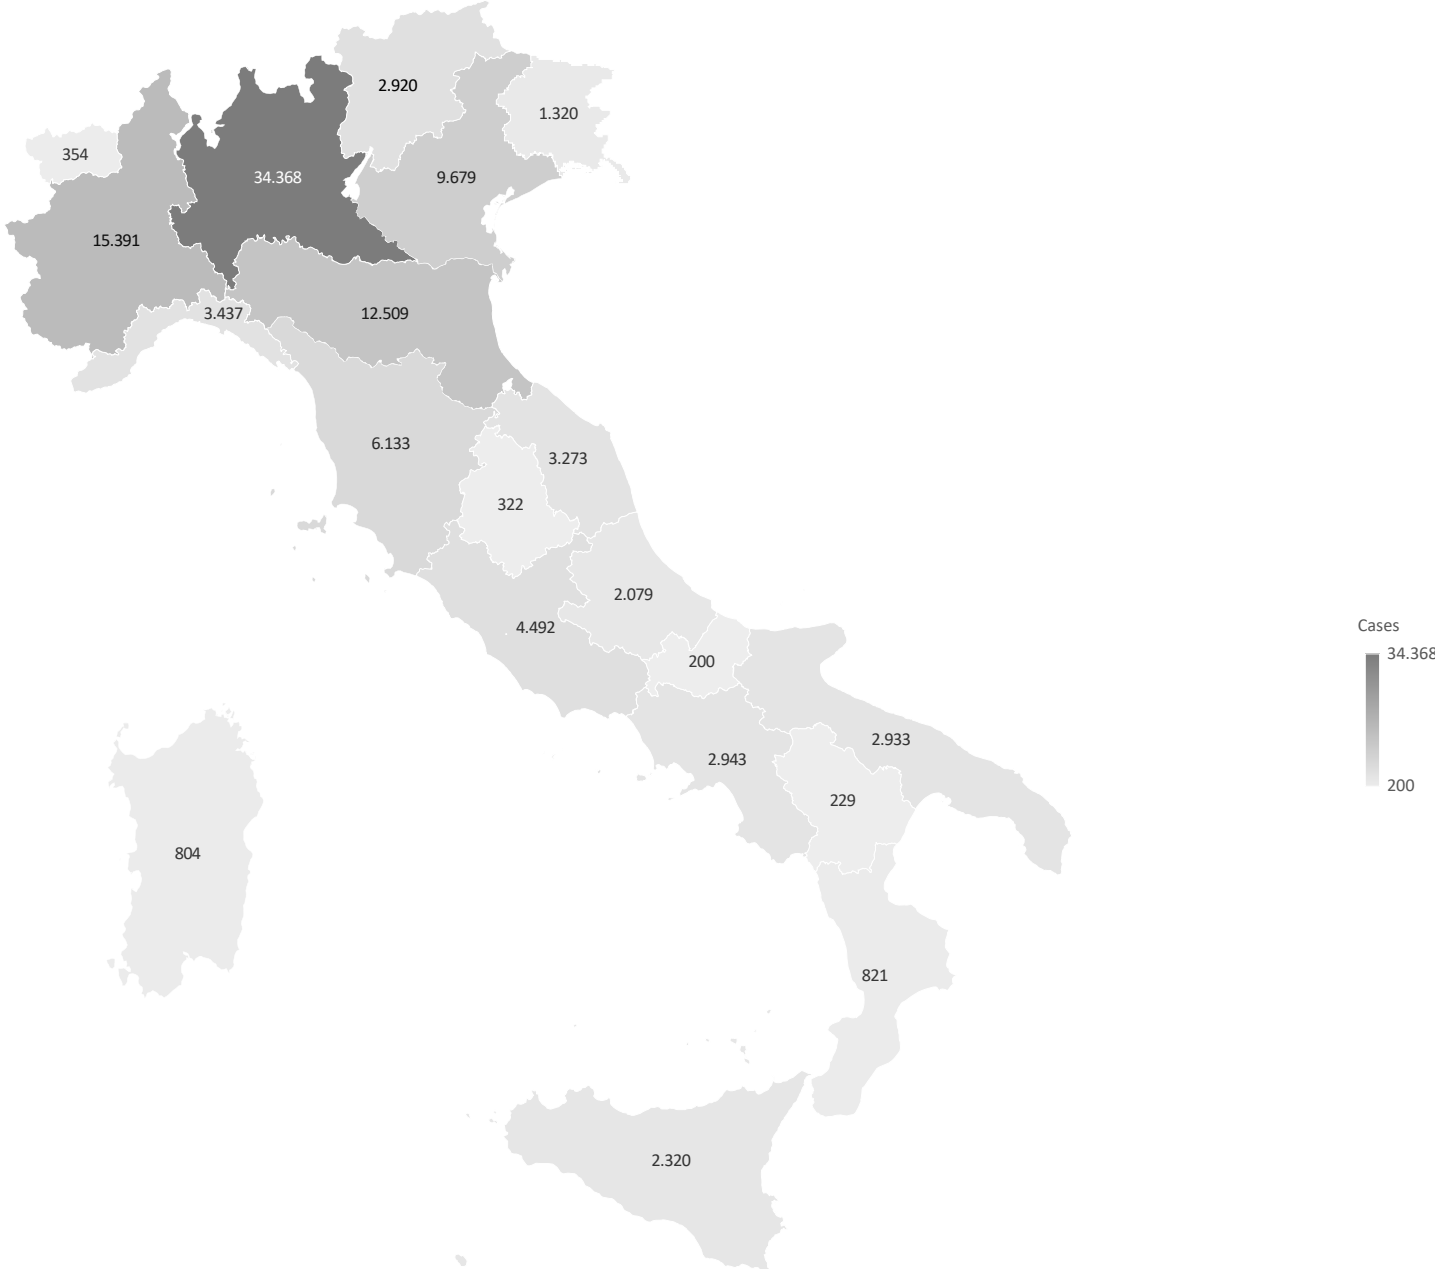

Supplement: 12967_2020_2399_MOESM1_ESM.pdf [file 12967_2020_2399_MOESM1_ESM.pdf]
